# Supplementary material for: Facile synthesis of CuO nanochains as high-rate anode materials for lithium-ion batteries
Source: Royal Society of Chemistry journal article supplement (doi:10.1039/c9nj01015g), 2019-01-01
Supplement: c9nj01015g1.pdf [file c9nj01015g1.pdf]

## ***Supporting Information***

### **Facile synthesis of CuO nanochains as high-rate anode materials for lithium-ion batteries**

Ping Wang,<sup>a,b,‡</sup> Xiao-Xia Gou,<sup>a,‡</sup> Sen Xin,<sup>c,\*</sup> and Fei-Fei Cao,<sup>a,b,\*</sup>

<sup>a</sup> College of Science, Huazhong Agricultural University, Wuhan, Hubei 430070, P. R. China

<sup>b</sup> College of Resources and Environment, Huazhong Agricultural University, Wuhan, Hubei 430070, PR  
China

<sup>c</sup> Department of Mechanical Engineering, The University of Texas at Austin, Austin, TX 78712, United  
States.

\*Corresponding authors. E-mail addresses: [xinsen@utexas.edu](mailto:xinsen@utexas.edu); [caofeifei@mail.hzau.edu.cn](mailto:caofeifei@mail.hzau.edu.cn).

P. W. and X.-X. G. contributed equally to this work.

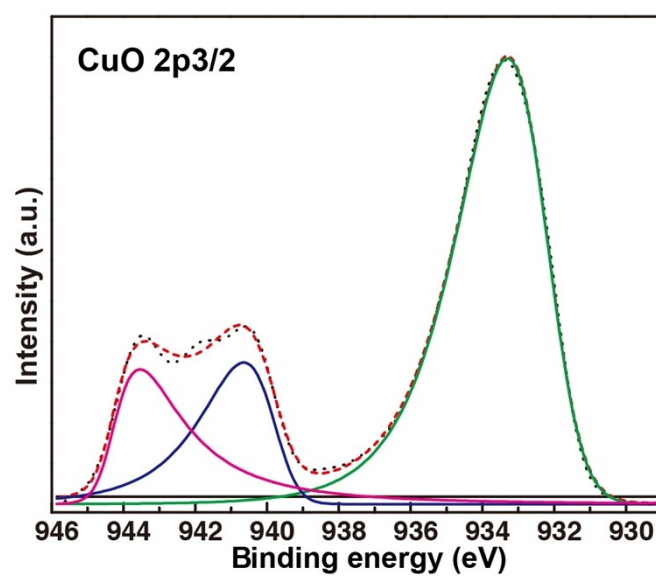

**Figure S1.** XPS spectrum of the CuO nanochains curve-fitting spectrum of Cu 2p  $3/2$ .

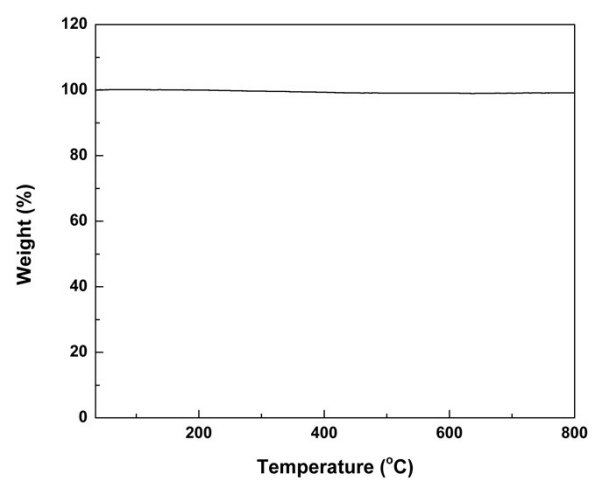

**Figure S2.** TGA profile of CuO nanochains. The sample was tested under air atmosphere from room temperature to 800 °C at a heating rate of 10 °C min<sup>-1</sup>.

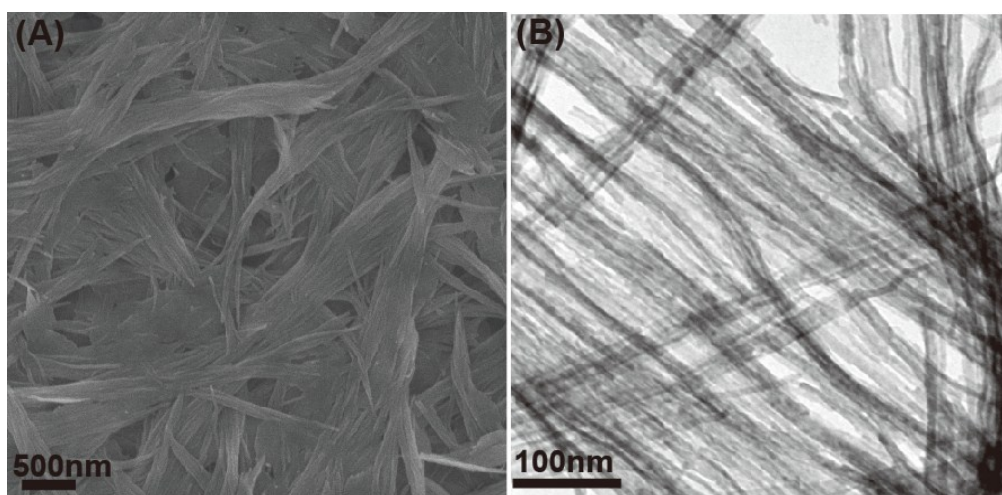

**Figure S3.** Morphological characterization of the precursor: (A) SEM image; (B) TEM image.

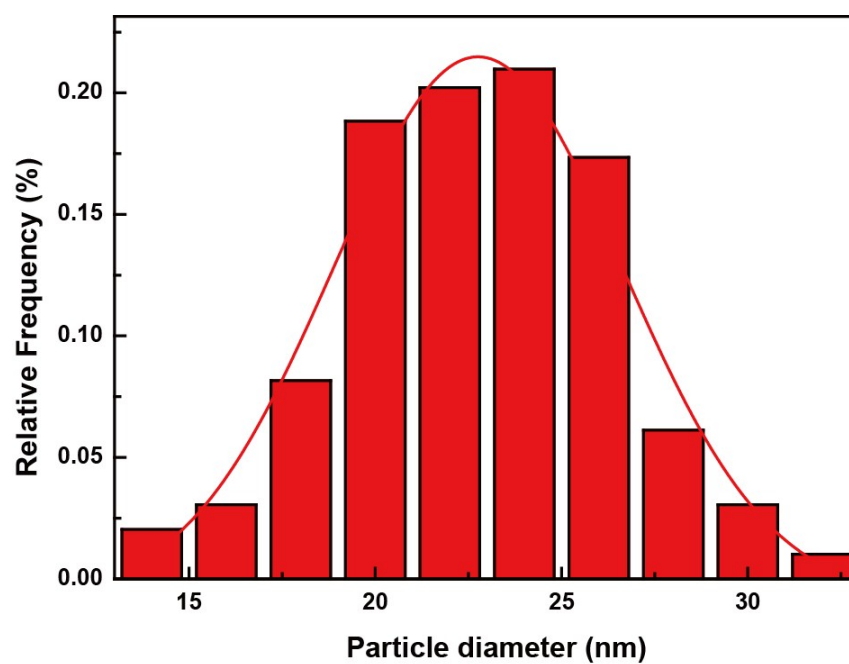

**Figure S4.** Statistical analysis on particle diameter of CuO nanochains.

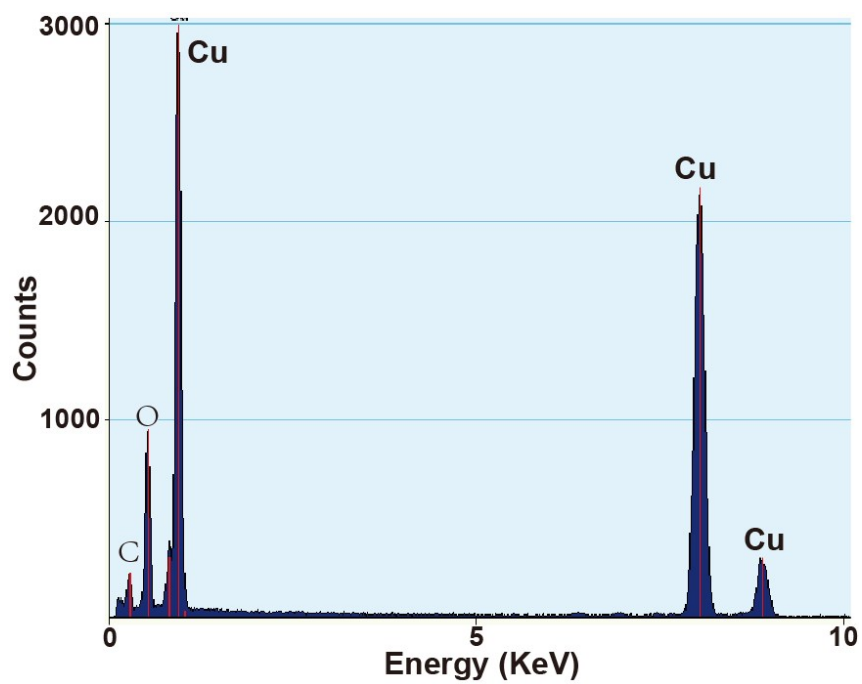

**Figure S5.** EDX compositional pattern of CuO nanochains.

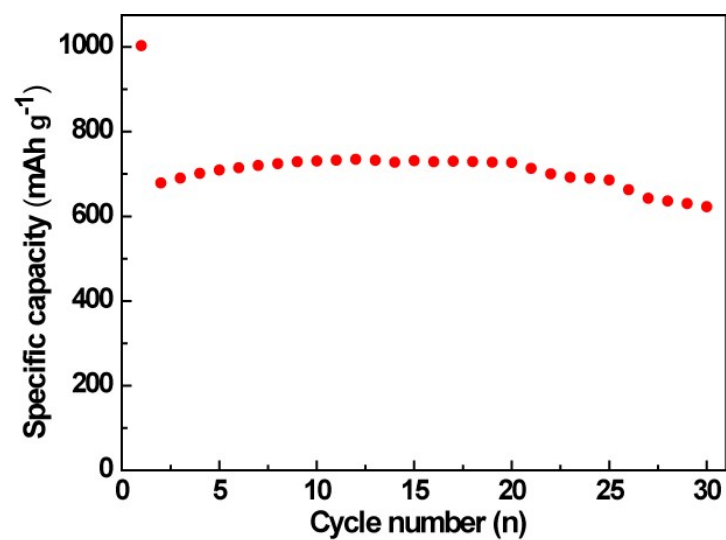

**Figure S6.** Cycling performance of the CuO nanochains electrode at 0.1 C. All the electrodes were tested between 0.001 and 3.0 V (vs. Li<sup>+</sup>/Li).
